# Supplementary material
Source: ML conference proceedings conference paper supplement (https://openaccess.thecvf.com/content/cvpr_2015/html/Bagautdinov_Probability_Occupancy_Maps_2015_CVPR_paper.html)
Supplement: Supplementary file 2 [file supplementary_results.pdf › supplementary/supplementary_results.pdf]

# Probability Occupancy Maps for Occluded Depth Images Supplementary Material

Anonymous CVPR submission  
Paper ID 1752

## Description

Below, we provide additional numerical results for four tested people detection datasets, for more various values of detector thresholds and overlap thresholds. Namely, for each dataset, there are two (composite) figures: one with MODA, and one with precision-recall curves. MODA scores are presented separately for each algorithm, for a number of detector confidence thresholds. Precision-recall curves are presented separately for several different overlap thresholds.

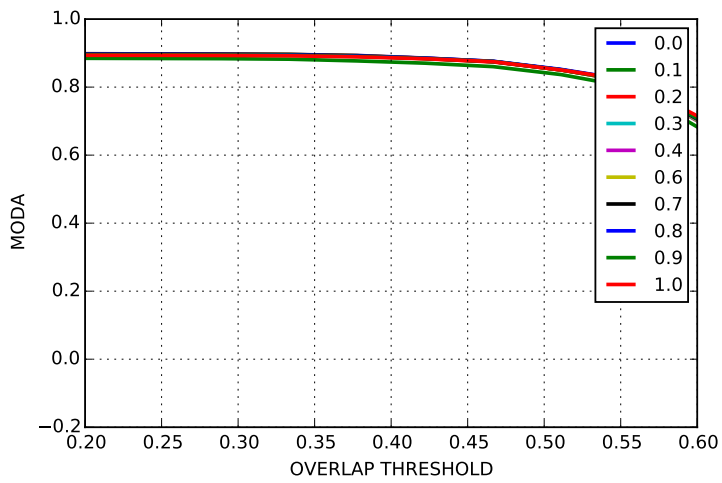

(a) DPOM

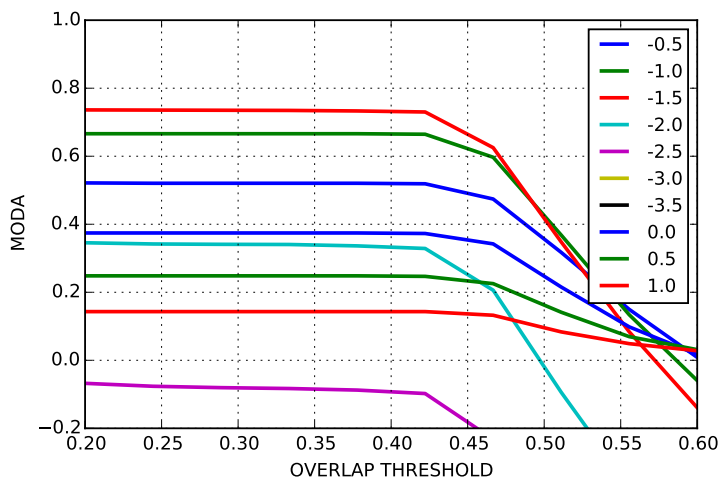

(b) PCL-MUNARO

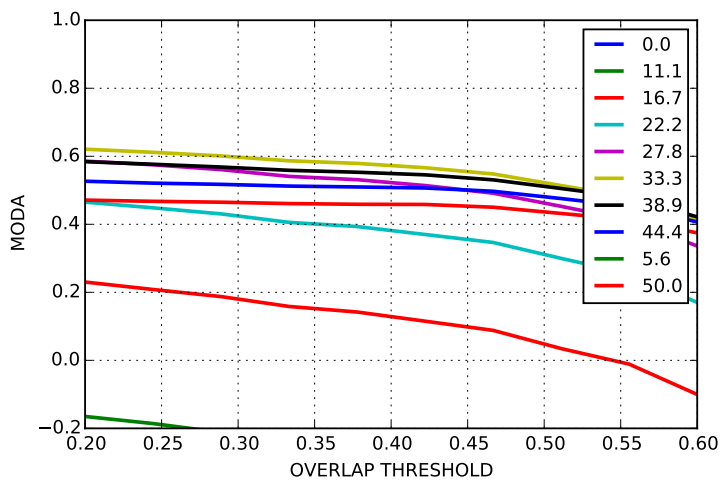

(c) ACF

Figure 1: MODA for KTP dataset. Detector confidence threshold is varied for each algorithm.

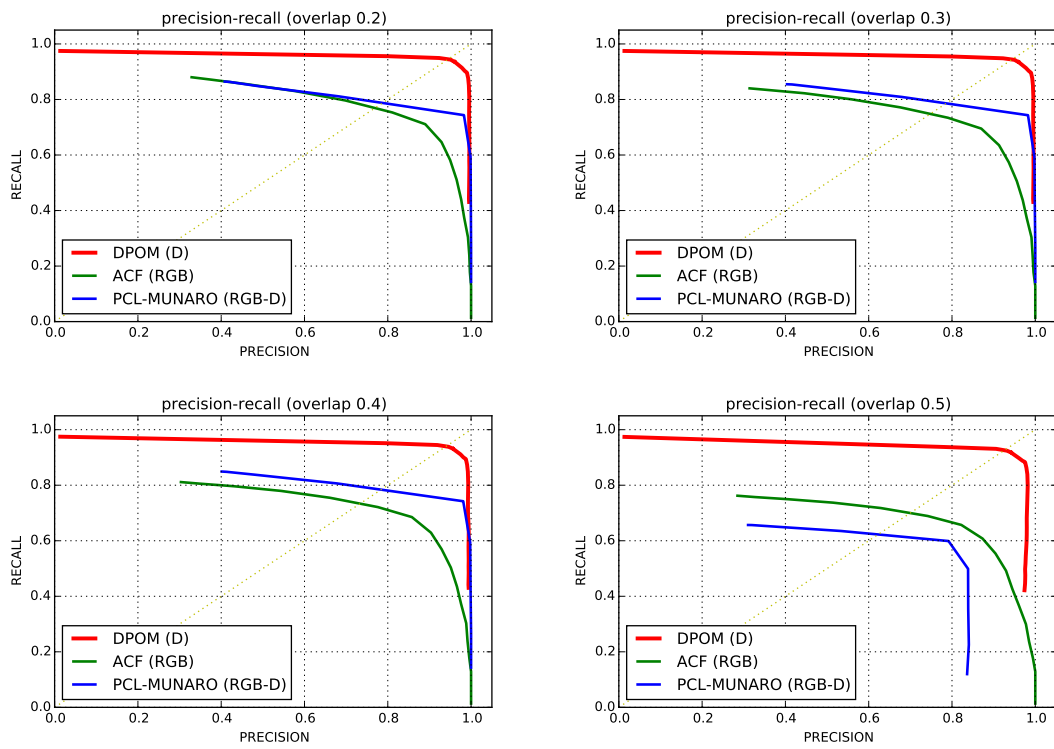

Figure 2: Precision-recall for KTP dataset. Various overlap thresholds.

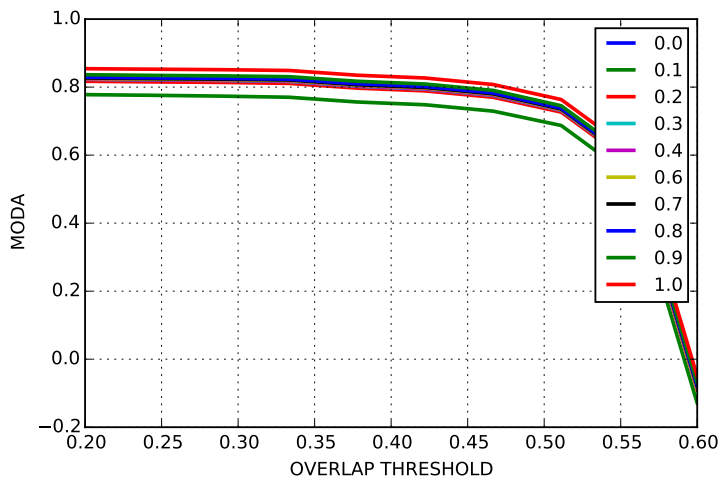

(a) DPOM

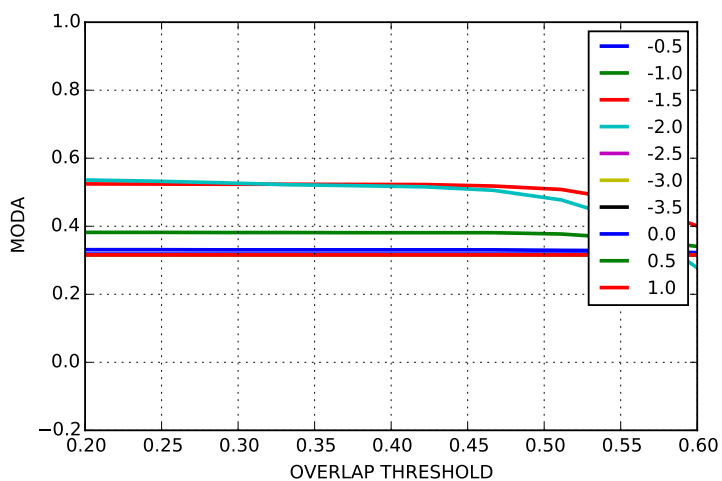

(b) PCL-MUNARO

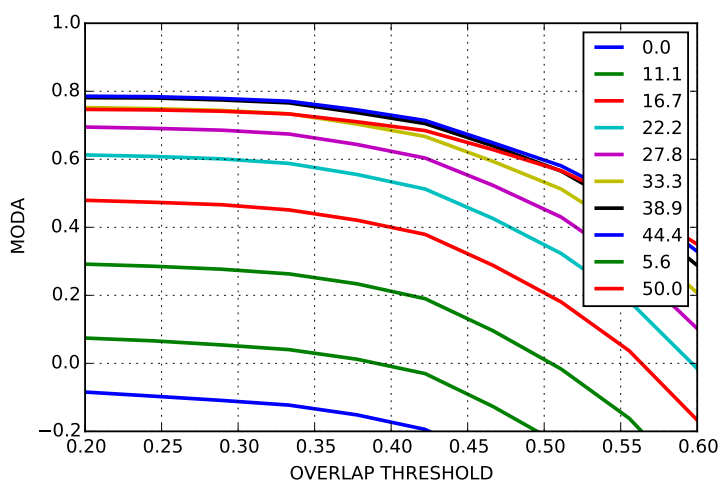

(c) ACF

Figure 3: MODA for UNIHALL dataset. Detector confidence threshold is varied for each algorithm.

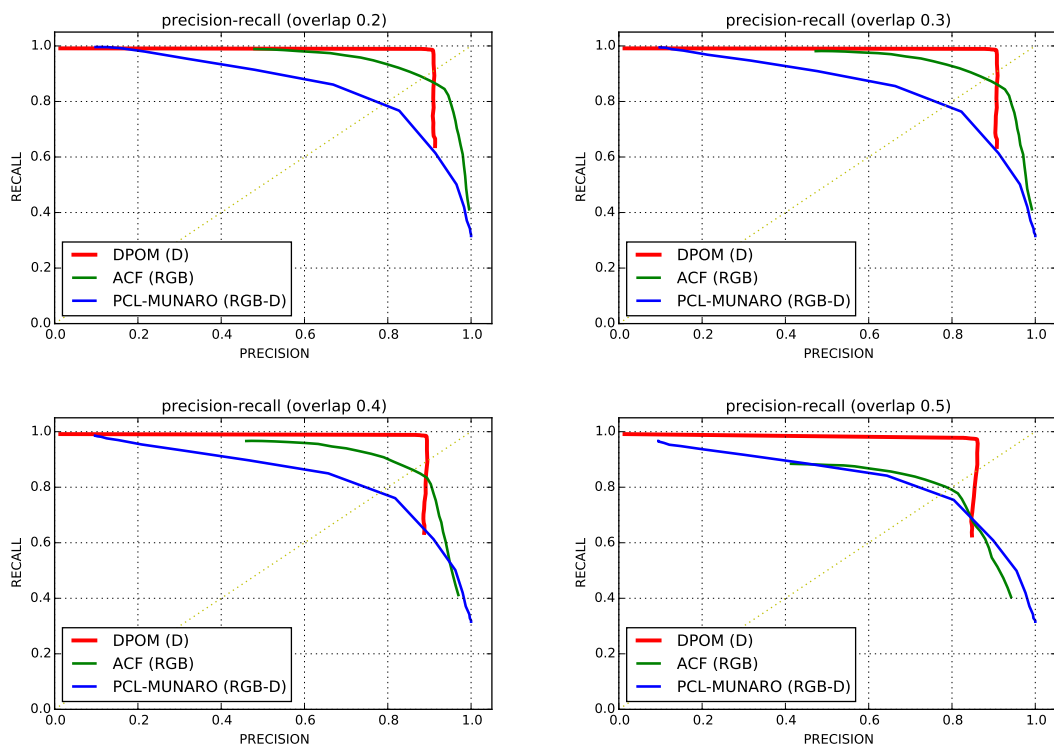

Figure 4: Precision-recall for UNIHALL dataset. Various overlap thresholds.

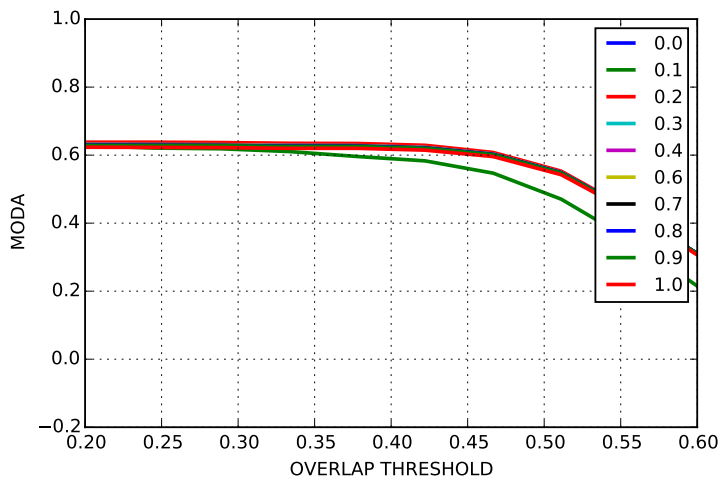

(a) DPOM

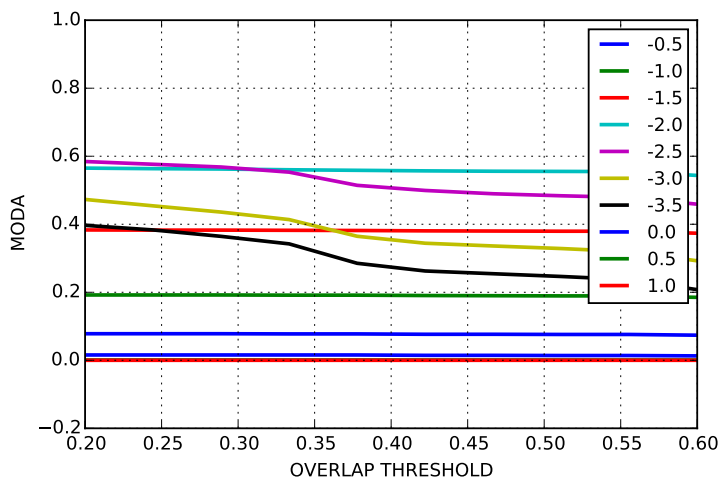

(b) PCL-MUNARO

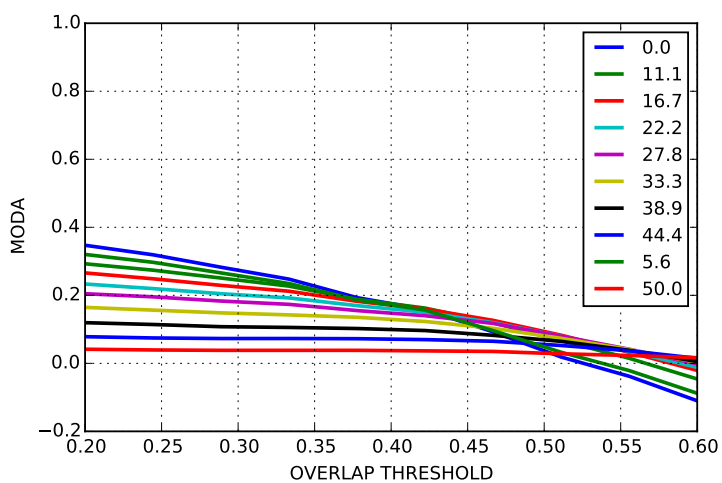

(c) ACF

Figure 5: MODA for OURS-CORRIDOR dataset. Detector confidence threshold is varied for each algorithm.

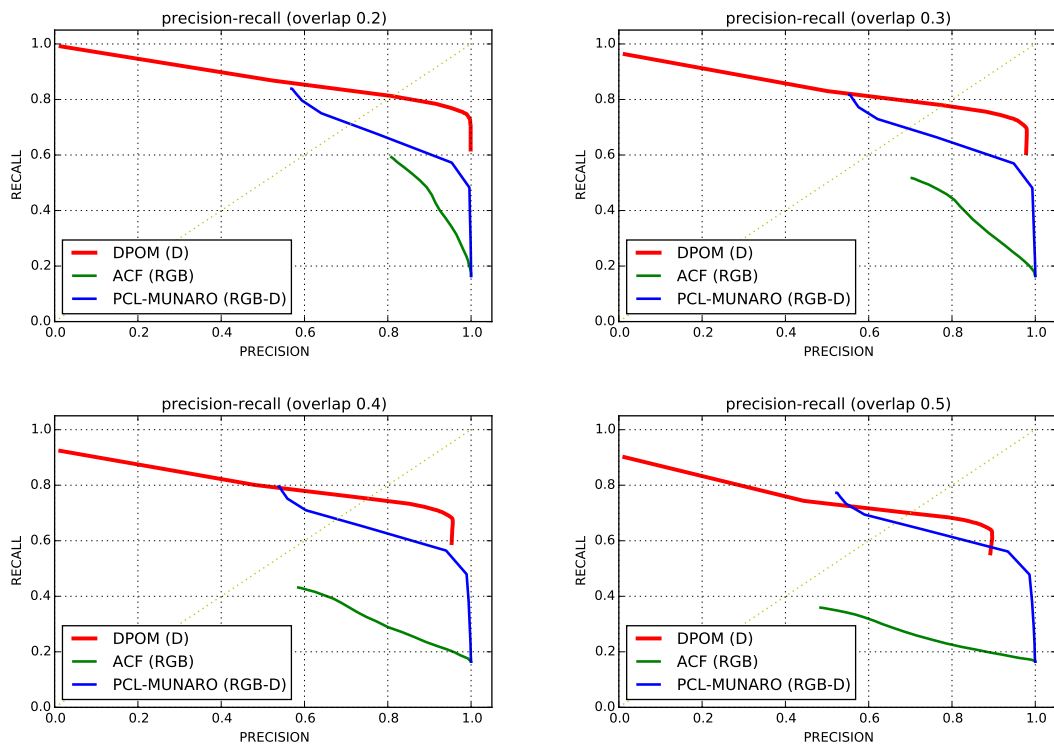

Figure 6: Precision-recall for OURS-CORRIDOR dataset. Various overlap thresholds.

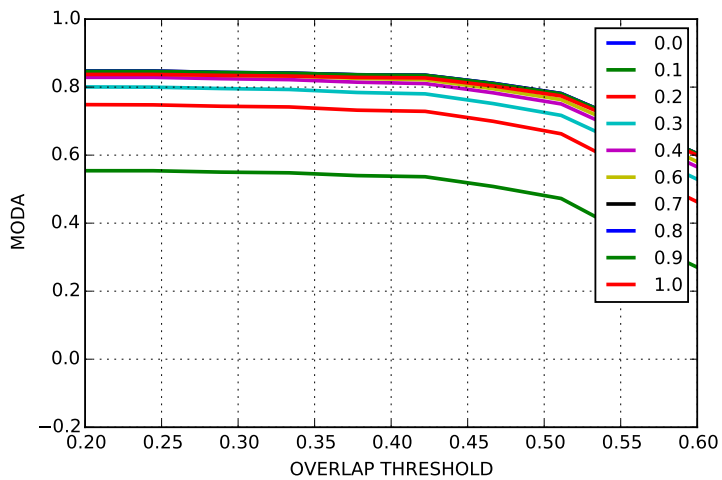

(a) DPOM

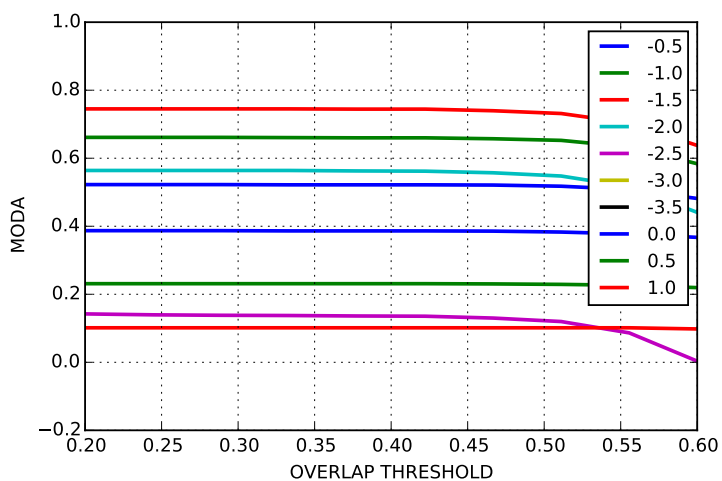

(b) PCL-MUNARO

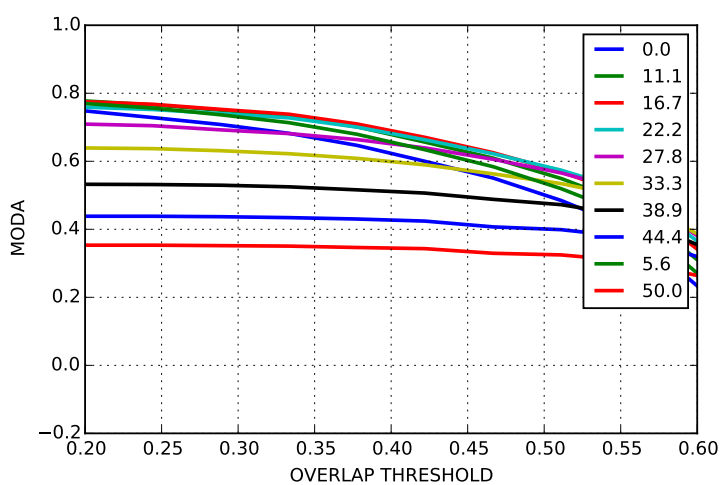

(c) ACF

Figure 7: MODA for OURS-LAB dataset. Detector confidence is varied per algorithm.



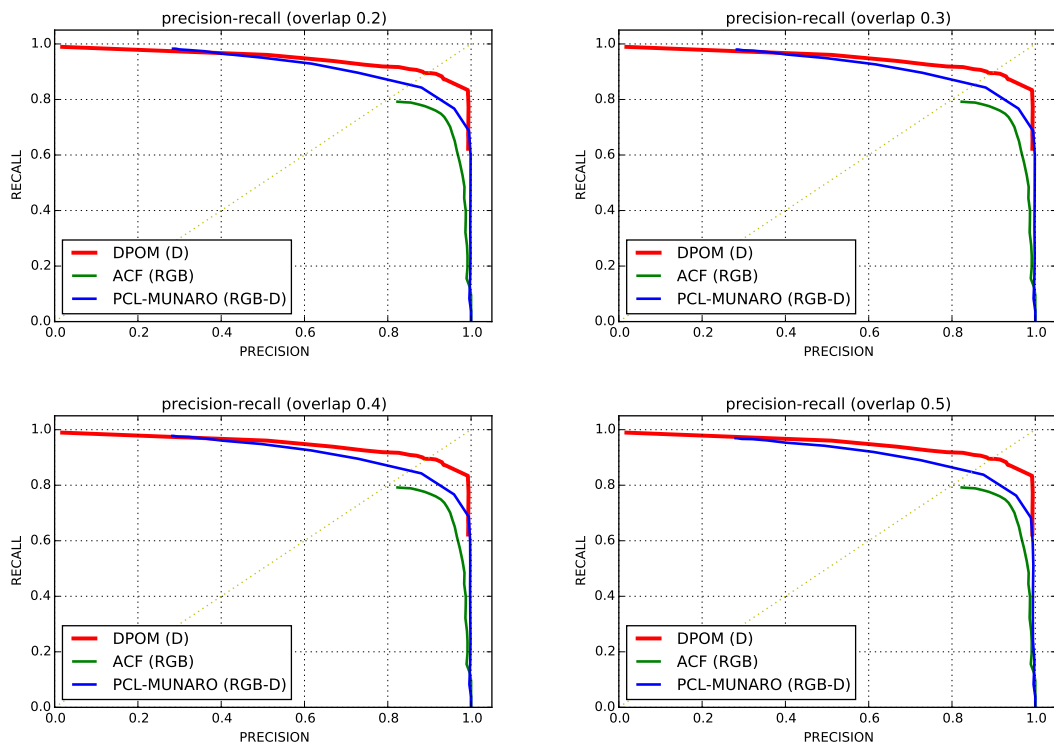

Figure 8: Precision-recall for OURS-LAB dataset. Various overlap thresholds.
